# Supplementary material for: Allogenic Adipose-Derived Stem Cells in Diabetic Foot Ulcer Treatment: Clinical Effectiveness, Safety, Survival in the Wound Site, and Proteomic Impact
Source: MDPI journal article supplement (doi:10.3390/ijms24021472), 2023-01-12
Supplement: s1 [file s1]

Table S6 – online quality

STR genotyping results of the donor DNA and DNA extracted from wound scrapings.

| SAMPLE           |  | AMEL | D3S1358     | D3S1358     | D1S1688     | D1S1688     | D2S441      | D2S441 | D1S16248    | D1S16248 | D1S3317 | D1S3317     | Penis E     | Penis E     | D1S16339    | D1S16339    | D1S1631     | D1S1631     | D2S1338     | D2S1338 | CSF1PO | CSF1PO | Penis D | Penis D     | TH01        | TH01        | VWA         | VWA         | D21S11   | D21S11 | D7S820     | D7S820      | D5S816      | D5S816      | TPOX        | TPOX        | D8S1179     | D8S1179 | D12S391     | D12S391     | D1S9433 | D1S9433     | SE33     | SE33        | D2S1045     | D2S1045 | D1S591 | FGA    | FGA    | D1S576 | D1S576 |        |
|------------------|--|------|-------------|-------------|-------------|-------------|-------------|--------|-------------|----------|---------|-------------|-------------|-------------|-------------|-------------|-------------|-------------|-------------|---------|--------|--------|---------|-------------|-------------|-------------|-------------|-------------|----------|--------|------------|-------------|-------------|-------------|-------------|-------------|-------------|---------|-------------|-------------|---------|-------------|----------|-------------|-------------|---------|--------|--------|--------|--------|--------|--------|
| Donor            |  | XX   | 17          | 18          | 14          | 15.3        | 13          | 14     | 14          | 14       | 9       | 11          | 11          | 14          | 12          | 13          | 18          | 22          | 18          | 22      | 22     | 11     | 11      | 13          | 6           | 4           | 18          | 16          | 31       | 31.2   | 10         | 10          | 11          | 12          | 8           | 9           | 12          | 12      | 17          | 21          | 14      | 14          | 21       | 29.2        | 15          | 17      | NA     | 19     | 20     | NA     | NA     |        |
| Length           |  |      | 103         | 147         | 161         | 208         | 214         | 250    | 255         | 299      | 302     | 390         | 371         | 466         | 84          | 132         | 134         | 214         | 224         | 296     | 318    | 362    | 377     | 450         | 72          | 127         | 183         | 203         | 259      | 269    | 313        | 321         | 369         | 393         | 441         | 76          | 124         | 442     | 496         | 193         | 245     | 21          | 428      | 464         | 265         | 411     |        |        |        |        |        |        |
| Mean length      |  |      | 125         |             | 184.5       |             | 232         |        | 277         |          | 328     |             | 418.5       |             | 108         |             | 174         |             | 260         |         | 340    |        | 413.5   |             | 93.5        |             | 155         |             | 231      |        | 291        |             | 417         |             | 417         |             | 100         |         | 464         |             | 0       |             | 444.5    |             | 338         |         |        |        |        |        |        |        |
| 1ABC01034 day 7  |  | XX   | 14          | 14          | 11          | 16.3        | 11          | 11.3   | 14          | 15       | 3       | 11          | 7           | 10          | 11          | 11          | 15          | 18          | 17          | 17      | 9      | 11     | 9       | 9           | 6           | 7           | 16          | 18          | 32.2     | 33.2   | 298565     | 10          | 10          | 9           | 13          | 8           | 8           | 13      | 15          | 18          | 20      | 14          | 14.2     | 16          | 28.2        | 15      | 16     |        |        |        |        |        |
| peak area        |  |      | 425259      | 393190      | 351521      | 363169      | 319639      | 381451 | 372636      | 354480   | 361535  | 330886      | 348839      | 243960      | 288569      | 346237      | 398468      | 344322      | 372776      | 501873  | 242859 | 231432 | 261995  | 216894      | 359253      | 461125      | 375149      | 368124      | 445161   |        |            | 312030      | 156936      | 362964      | 258183      | 306701      | 205980      | 280593  | 298680      | 264117      | 210450  | brak        | 19       | 23          |             |         |        |        |        |        |        |        |
| admixture        |  |      | 17          | 18          | 14          | 15.3 (s)    | 13          | 14     | 14          | 14       | 11      | 11          | 14          | 12          | 13          | 18          | 22          | 18          | 22          | 22      | 11     | 11     | 13      | 6           | 4           | 18          | 16          | 31          | 31.2 (s) | 10     | 10         | 11          | 12          | 8           | 9           | 12          | 12          | 17      | 21          | 14          | 14      | 21          | 29.2     | 15          | 17          | NA      | 19     | 20     | NA     | NA     |        |        |
| peak area        |  |      | 7404        | 4130        | 9440        | 47357       | 8645        | 9363   |             |          |         | 7421        | 39356       | 7300        | 7750        | 16172       | 13686       | 10903       |             |         |        | 17780  |         |             | 12748       | 40056       |             |             | 6775     | 44331  |            |             | 14 (s)      | 19551       |             |             | 36666       | 21362   |             |             | 5006    |             |          |             |             |         |        |        |        |        |        |        |
| %                |  |      | 0.033649422 | 0.019953375 | 0.024748268 | 0.024696542 | 0.026692933 |        |             |          |         | 0.021368709 | 0.103781857 | 0.056466584 | 0.059739459 | 0.048480851 | 0.041336317 | 0.051885199 | 0.066166387 |         |        |        |         |             | 0.037312275 |             |             | 0.01790379  |          |        | 0.01790379 |             |             |             |             |             | 0.064355876 |         | 0.020173526 |             |         |             |          |             |             |         |        |        |        |        |        |        |
| 1ABC01033 day 7  |  | XY   | 14          | 15          | 16          | 17          | 11.3        | 13     | 15          | 17       | 9       | 11          | 7           | 10          | 9           | 11          | 13          | 16          | 17          | 29      | 11     | 14     | 12      | 13          | 7           | 7           | 15          | 15          | 29       | 29     | 7          | 10          | 10          | 11          | 8           | 8           | 14          | 15      | 17          | 18          | 13      | 13          | 21       | 35.2        | 11          | 11      | 10     | 23     | 26     | 16     | 17     |        |
| peak area        |  |      | 105260      | 101872      | 104520      | 64663       | 82656       | 70979  | 94405       | 67276    | 66447   | 60544       | 60463       | 76369       | 121035      | 116920      | 123743      | 92770       | 82775       | 80943   | 97654  | 103863 | 74859   | 108715      | 155932      |             | 109293      |             | 29       | 29     | 7          | 10          | 10          | 11          | 8           | 8           | 14          | 15      | 17          | 18          | 13      | 13          | 21       | 35.2        | 11          | 11      | 10     | 23     | 26     | 16     | 17     |        |
| admixture        |  |      | 17          | 18          | 14          | 15.3        | 13          | 14     | 14          | 14       | 11      | 11          | 14          | 12          | 13          | 18          | 22          | 18          | 22          | 22      | 11     | 11     | 13      | 6           | 4           | 18          | 16          | 31          | 31.2     | 10     | 10         | 11          | 12          | 8           | 9           | 12          | 12          | 17      | 21          | 14          | 14      | 21          | 29.2     | 15          | 17          | NA      | 19     | 20     | NA     | NA     |        |        |
| peak area        |  |      | 1758        |             |             |             |             |        |             |          |         |             |             | 5195        | 2841        |             |             | 2689        | 3583        |         |        |        |         |             |             | 4787        |             | 3790        |          |        |            |             | 2952        |             | 3505        | 6280        |             |         | 3453        |             |         |             | 3229     |             |             |         |        |        |        |        |        |        |
| %                |  |      | 0.016691352 |             |             |             |             |        |             |          |         |             |             | 0.041836961 | 0.023321581 |             |             | 0.031804419 | 0.04193488  |         |        |        |         |             |             | 0.080543801 |             | 0.05653763  |          |        |            | 0.041348592 |             | 0.088250652 |             |             | 0.033222368 |         |             | 0.043324071 |         |             |          |             |             |         |        |        |        |        |        |        |
| 1ABC01035 day 7  |  | XY   | 15          | 16          | 13          | 17.3        | 10          | 14     | 15          | 16       | 8       | 12          | 10          | 13          | 12          | 13          | 15          | 15          | 16          | 19      | 8      | 12     | 9       | 13          | 8           | 9           | 15          | 17          | 27       | 30.2   | 10         | 10          | 11          | 12          | 8           | 11          | 13          | 13      | 17          | 22          | 14      | 15          | 15       | 30.2        | 12          | 15      | 10     | 22     | 24     | 18     | 19     |        |
| peak area        |  |      | 318948      | 296390      | 333301      | 282799      | 299999      | 261410 | 216204      | 199213   | 270192  | 175337      | 149825      | 138600      | 348307      | 344536      | 401053      |             | 214884      | 159713  | 225632 | 225609 | 145005  | 158453      | 219527      | 207273      | 233757      | 195064      | 231531   | 201111 | 352833     |             | 177096      | 168058      | 158357      | 131748      | 362215      |         |             | 318315      | 273517  | 197469      | 152797   | 162283      | 118805      | 143237  | 116063 | 330877 | 314926 | 298526 | 194475 | 191257 |
| admixture        |  |      | 17          | 18          | 15.3        |             | 6297        |        |             |          |         |             |             |             | 18          | 22          | 18          | 22          | 22          | 11      | 11     | 13     | 6       | 4           | 18          | 16          | 31          | 31.2        | 10       | 10     | 11         | 12          | 8           | 9           | 12          | 12          | 17          | 21      | 14          | 14          | 21      | 29.2        | 15       | 17          | NA          | 19      | 20     | NA     | NA     |        |        |        |
| peak area        |  |      | 9177        |             |             |             |             |        |             |          |         |             |             |             | 7581        | 2580        |             | 4398        |             |         |        |        |         |             |             | 2433        |             |             |          |        |            |             |             | 2930        |             |             |             |         |             |             |         |             |          | 6001        | 8569        |         |        |        |        |        |        |        |
| %                |  |      | 0.028963997 |             |             |             | 0.020032093 |        |             |          |         |             |             |             | 0.036428289 | 0.012702695 |             | 0.022942516 |             |         |        |        |         |             |             | 0.011272604 |             |             |          |        |            |             |             | 0.019799638 |             |             |             |         |             |             |         |             |          | 0.019189261 | 0.027177722 |         |        |        |        |        |        |        |
| 1ABC01019 day 7  |  | XY   | 14          | 15          | 12          | 15          | 10          | 14     | 15          | 16       | 8       | 11          | 5           | 10          | 13          | 13          | 12          | 17          | 19          | 20      | 10     | 11     | 9       | 9           | 6           | 7           | 14          | 19          | 27       | 30     | 9          | 11          | 10          | 11          | 8           | 8           | 15          | 15      | 20          | 22          | 12      | 15          | 25.2     | 30.2        | 15          | 16      | 10     | 21     | 22     | 19     | 18     |        |
| peak area        |  |      | 402602      | 368484      | 342029      | 364036      | 374038      | 359860 | 297240      | 303226   | 348612  | 281880      | 212561      | 175634      | 267666      | 349150      | 335262      | 241176      | 188536      | 302267  | 300029 | 411786 |         | 354224      | 305879      | 348042      | 320732      | 324835      | 313798   | 312667 | 257126     | 330538      | 257126      | 424105      |             |             | 419715      |         | 349474      | 363613      | 265550  | 271021      | 246613   | 198784      | 202252      | 204747  | 328204 | 345136 | 313792 | 253831 | 237414 |        |
| admixture        |  |      | 17          | 18          | 14 (s)      | 15.3        | 13          | 14     | 14          | 14       | 11      | 11          | 14          | 12          | 13          | 18          | 22          | 18          | 22          | 22      | 11     | 11     | 13      | 6           | 4           | 18          | 16          | 31          | 31.2     | 10     | 10         | 11          | 12          | 8           | 9           | 12          | 12          | 17      | 21          | 14          | 14      | 21          | 29.2 (s) | 15          | 17          | NA      | 19     | 20     | NA     | NA     |        |        |
| peak area        |  |      | 21504       | 15628       | 72813       | 14652       | 27612       | 34030  | 6009        | 4194     | 93428   | 19266       | 8191        | 25585       |             |             |             | 11574       | 19604       |         |        |        |         |             |             | 11674       | 21605       | 7983        | 21210    | 42511  |            |             | 8463        | 13776       | 6594        | 13776       | 16093       | 10394   | 10394       | 53195       | 54708   | 2207        | 30319    |             |             | 16272   | 51545  |        |        |        |        |        |
| %                |  |      | 0.05282928  | 0.039434837 |             | 0.039849382 | 0.069981574 |        | 0.101806063 |          |         |             | 0.030024162 | 0.020706201 |             | 0.053298734 | 0.023376342 | 0.047032733 |             |         |        |        |         | 0.053221868 | 0.061669938 | 0.069845005 | 0.024390505 | 0.062285901 |          |        |            | 0.027995832 | 0.030158269 | 0.061609181 | 0.071046778 | 0.02832635  |             |         | 0.00981301  |             |         | 0.052545609 |          |             |             |         |        |        |        |        |        |        |
| 1ABC01019 day 14 |  | XY   | 14          | 15          | 12          | 15          | 10          | 14     | 15          | 16       | 8       | 11          | 5           | 10          | 13          | 13          | 12          | 17          | 19          | 20      | 10     | 11     | 9       | 9           | 6           | 7           | 14          | 19          | 27       | 30     | 9          | 11          | 10          | 11          | 8           | 8           | 15          | 15      | 20          | 22          | 12      | 15          | 25.2     | 30.2        | 15          | 16      | 10     | 21     | 22     | 19     | 18     |        |
| peak area        |  |      | 263622      | 209050      | 218079      | 256253      | 202783      | 217907 | 175068      | 138243   | 205048  | 144112      | 108470      | 91776       | 355494      | 244264      | 193861      | 128369      | 118412      | 152247  | 162916 | 232132 |         | 179006      | 154000      | 184892      | 181317      | 162527      | 172210   | 160595 | 138669     | 145175      | 129616      | 294558      |             |             | 281786      |         | 216362      | 224608      | 178423  | 147001      | 246613   | 198784      | 202252      | 204747  | 328204 | 345136 | 313792 | 253831 | 237414 |        |
| admixture        |  |      | 17          | 18          | 14 (s)      | 15.3        | 13          | 14     | 14          | 14       | 11      | 11          | 14          | 12          | 13          | 18          | 22          | 18          | 22          | 22      | 11     | 11     | 13      | 6           | 4           | 18          | 16          | 31          | 31.2     | 10     | 10         | 11          | 12          | 8           | 9           | 12          | 12          | 17      | 21          | 14          | 14      | 21          | 29.2 (s) | 15          | 17          | NA      | 19     | 20     | NA     | NA     |        |        |
| peak area        |  |      | 9197        | 4376        | 31792       | 5745        |             |        |             |          |         |             |             | 59420       | 8725        | 10294       | 14632       |             |             |         |        |        | 7734    |             |             | 7393        |             | 13380       | 5474     | 13704  | 18554      |             |             | 3947        |             | 2905        | 12977       | 6905    | 5833        | 35323       | 23779   |             |          | 4940        | 15878       |         |        |        |        |        |        |        |
| %                |  |      | 0.037457287 | 0.018179401 |             | 0.023650686 |             |        |             |          |         |             |             |             |             | 0.038303243 | 0.044882094 | 0.041377757 |             |         |        |        |         | 0.042513916 |             | 0.068096975 | 0.031670451 | 0.075682392 |          |        |            | 0.027925076 | 0.019342939 | 0.084337428 | 0.046719171 | 0.025773583 |             |         | 0.026029934 |             |         | 0.026029934 |          |             |             |         |        |        |        |        |        |        |
| 1ABC01026 day 7  |  | XY   | 16          | 18          | 14          | 16          | 11          | 14     | 15          | 16       | 11      | 11          | 7           | 14          | 12          | 13          | 14          | 17          | 20          | 24      | 11     | 12     | 9       | 13          | 7           | 8           | 18          | 19          | 27       | 28     | 8          | 12          | 11          | 12          | 8           | 8           | 10          | 14      | 19          | 20          | 13      | 15          | 20       | 27.2        | 15          | 15      | 10     | 23     | 25     | 18     | 18     |        |
| peak area        |  |      | 294297      | 265570      | 278358      | 244484      | 186263      | 246744 | 272664      | 302401   | 408384  | 221312      | 182288      | 317902      | 296315      | 299809      | 316035      | 319243      | 261176      | 42938   | 391069 | 202148 | 313763  | 169946      | 191168      | 188258      | 160504      | 249141      | 216363   | 185582 | 193959     | 296519      | 202061      | 389567      |             |             | 160185      | 132972  | 279112      | 284858      | 186248  | 190543      | 142792   | 192008      | 346812      | 302928  | 215291 | 229697 | 318598 | 227438 |        |        |
| admixture        |  |      | 17          | 18          | 14 (s)      | 15.3        | 13          | 14     | 14          | 14       | 11      | 11          | 14          | 12          | 13          | 18          | 22          | 18          | 22          | 22      | 11     | 11     | 13      | 6           | 4           | 18          | 16          | 31          | 31.2     | 10     | 10         | 11          | 12          | 8           | 9           | 12          | 12          | 17      | 21          | 14          | 14      | 21          | 29.2 (s) | 15          | 17          |         |        |        |        |        |        |        |
